# Supplementary material
Source: Springer Nature journal article supplement (https://www.springermedizin.de/resource/supplementary/12936_2014_3388_MOESM4_ESM.pdf/9545776)

MINIMUM NUMBER OF DETECTED  
BLOOD UTILIZATION EVENTS ( $m_{v,\omega}^{\min}$ )

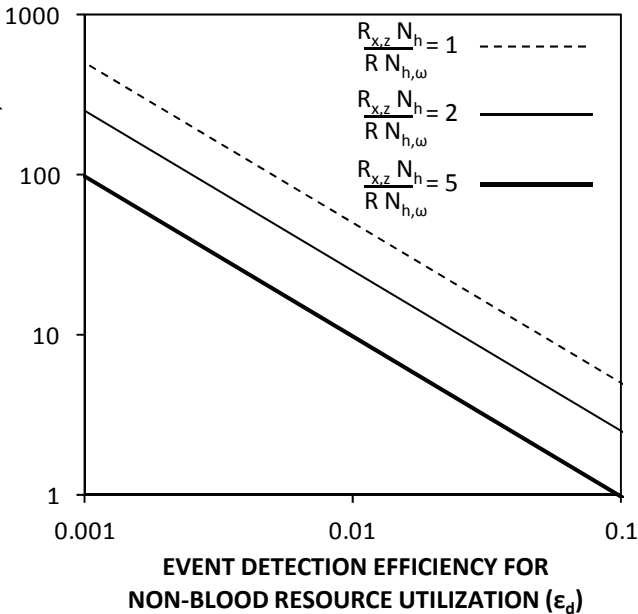

Supplement: MOESM4 [file 9545776]
